# Supplementary material for: Normative Topographic Anterior and Posterior Corneal Astigmatism: Axis Distribution and Its Relations with Ocular and Biometric Parameters
Source: MDPI journal article supplement (doi:10.3390/jcm12113664), 2023-05-25
Supplement: s1 [file s1]

Supplemental Table S1.- ANOVA test for ACA steep axis orientation:

|                                                                                                                                                                                                                                                                               | ACA steep axis orientation |       |                      |       |                     |       |         |
|-------------------------------------------------------------------------------------------------------------------------------------------------------------------------------------------------------------------------------------------------------------------------------|----------------------------|-------|----------------------|-------|---------------------|-------|---------|
|                                                                                                                                                                                                                                                                               | Vertical                   |       | Oblique              |       | Horizontal          |       |         |
| Variables (units)                                                                                                                                                                                                                                                             | Mean                       | SD    | Mean                 | SD    | Mean                | SD    | Sig.    |
| Age (y)                                                                                                                                                                                                                                                                       | 48,68 <sub>a</sub>         | 14,55 | 54,45 <sub>b</sub>   | 14,01 | 56,11 <sub>b</sub>  | 15,36 | <0.000* |
| PD (mm)                                                                                                                                                                                                                                                                       | 3,04 <sub>a</sub>          | 0,68  | 2,95 <sub>a</sub>    | 0,63  | 2,94 <sub>a</sub>   | 0,58  | 0,210   |
| ACD (mm)                                                                                                                                                                                                                                                                      | 2,81 <sub>a</sub>          | 0,43  | 2,74 <sub>a</sub>    | 0,45  | 2,76 <sub>a</sub>   | 0,42  | 0,179   |
| WTW (mm)                                                                                                                                                                                                                                                                      | 12,11 <sub>a</sub>         | 0,41  | 12,07 <sub>a,b</sub> | 0,43  | 11,97 <sub>b</sub>  | 0,40  | 0,009   |
| AXL (mm)                                                                                                                                                                                                                                                                      | 23,91 <sub>a</sub>         | 1,52  | 23,92 <sub>a</sub>   | 1,68  | 23,95 <sub>a</sub>  | 1,68  | 0,981   |
| Ele F Apex (µm)                                                                                                                                                                                                                                                               | 1,91 <sub>a</sub>          | 1,13  | 1,49 <sub>b</sub>    | 1,20  | 1,51 <sub>b</sub>   | 1,20  | <0.000* |
| Ele F Thin (µm)                                                                                                                                                                                                                                                               | 2,19 <sub>a</sub>          | 1,74  | 1,53 <sub>b</sub>    | 1,56  | 1,23 <sub>b</sub>   | 1,65  | <0.000* |
| Ele B Apex (µm)                                                                                                                                                                                                                                                               | 3,32 <sub>a</sub>          | 3,35  | 4,00 <sub>a</sub>    | 3,11  | 3,82 <sub>a</sub>   | 3,61  | 0,084   |
| Ele B Thin (µm)                                                                                                                                                                                                                                                               | 7,47 <sub>a</sub>          | 5,64  | 7,87 <sub>a</sub>    | 5,20  | 8,73 <sub>a</sub>   | 6,30  | 0,116   |
| Pachy (µm)                                                                                                                                                                                                                                                                    | 545,96 <sub>a</sub>        | 32,38 | 548,88 <sub>a</sub>  | 32,28 | 547,19 <sub>a</sub> | 37,68 | 0,675   |
| Sphere (D)                                                                                                                                                                                                                                                                    | -,60 <sub>a</sub>          | 3,43  | -,03 <sub>a</sub>    | 3,82  | ,02 <sub>a</sub>    | 3,18  | 0,106   |
| RA (D)                                                                                                                                                                                                                                                                        | ,78 <sub>a</sub>           | 0,89  | 1,04 <sub>b</sub>    | 0,92  | 1,15 <sub>b</sub>   | 0,82  | <0.000* |
| ACA (D)                                                                                                                                                                                                                                                                       | 1,11 <sub>a</sub>          | 0,82  | ,76 <sub>b</sub>     | 0,60  | ,71 <sub>b</sub>    | 0,60  | <0.000* |
| PCA (D)                                                                                                                                                                                                                                                                       | ,37 <sub>a</sub>           | 0,17  | ,27 <sub>b</sub>     | 0,13  | ,23 <sub>c</sub>    | 0,13  | <0.000* |
| K1F (D)                                                                                                                                                                                                                                                                       | 43,32 <sub>a</sub>         | 1,51  | 43,39 <sub>a</sub>   | 1,48  | 43,43 <sub>a</sub>  | 1,57  | 0,753   |
| K2F (D)                                                                                                                                                                                                                                                                       | 44,43 <sub>a</sub>         | 1,49  | 44,15 <sub>a</sub>   | 1,41  | 44,14 <sub>a</sub>  | 1,56  | 0,058   |
| KmF (D)                                                                                                                                                                                                                                                                       | 43,86 <sub>a</sub>         | 1,44  | 43,76 <sub>a</sub>   | 1,42  | 43,78 <sub>a</sub>  | 1,54  | 0,718   |
| K1B (D)                                                                                                                                                                                                                                                                       | -6,18 <sub>a</sub>         | 0,24  | -6,21 <sub>a</sub>   | 0,26  | -6,23 <sub>a</sub>  | 0,27  | 0,066   |
| K2B (D)                                                                                                                                                                                                                                                                       | -6,55 <sub>a</sub>         | 0,27  | -6,48 <sub>b</sub>   | 0,27  | -6,46 <sub>b</sub>  | 0,31  | 0,001*  |
| KmB (D)                                                                                                                                                                                                                                                                       | -6,36 <sub>a</sub>         | 0,24  | -6,35 <sub>a</sub>   | 0,26  | -6,34 <sub>a</sub>  | 0,29  | 0,804   |
| QF                                                                                                                                                                                                                                                                            | -,32 <sub>a</sub>          | 0,12  | -,27 <sub>b</sub>    | 0,12  | -,27 <sub>b</sub>   | 0,14  | <0.000* |
| QB                                                                                                                                                                                                                                                                            | -,27 <sub>a</sub>          | 0,22  | -,31 <sub>a</sub>    | 0,20  | -,30 <sub>a</sub>   | 0,22  | 0,117   |
| Values in the same row and subtable that do not share the same subscript are significantly different at p<0.05 in the two-sided test for equality for Column Means.<br>Cells without a subscript are not included in the test. The tests assume equal variances. <sup>1</sup> |                            |       |                      |       |                     |       |         |
| <sup>1</sup> . Tests are adjusted for all pairwise comparisons within a row of each innermost subtable using the Bonferroni correction.                                                                                                                                       |                            |       |                      |       |                     |       |         |

Supplemental Table S2.- ANOVA test for PCA steep axis orientation:

| PCA steep axis orientation                                                                                                                                           |                     |       |                      |       |                      |       |        |
|----------------------------------------------------------------------------------------------------------------------------------------------------------------------|---------------------|-------|----------------------|-------|----------------------|-------|--------|
| Variables (units)                                                                                                                                                    | Vertical            |       | Oblique              |       | Horizontal           |       | Sig.   |
|                                                                                                                                                                      | Mean                | SD    | Mean                 | SD    | Mean                 | SD    |        |
| Age (y)                                                                                                                                                              | 50,09 <sub>a</sub>  | 14,78 | 56,51 <sub>b</sub>   | 14,76 | 48,64 <sub>a,b</sub> | 16,69 | 0,023* |
| PD (mm)                                                                                                                                                              | 3,02 <sub>a</sub>   | 0,66  | 2,92 <sub>a</sub>    | 0,70  | 3,04 <sub>a</sub>    | 0,48  | 0,636  |
| ACD (mm)                                                                                                                                                             | 2,80 <sub>a,b</sub> | 0,43  | 2,67 <sub>a</sub>    | 0,41  | 3,02 <sub>b</sub>    | 0,59  | 0,036* |
| WTW (mm)                                                                                                                                                             | 12,09 <sub>a</sub>  | 0,41  | 11,99 <sub>a</sub>   | 0,39  | 12,01 <sub>a</sub>   | 0,68  | 0,268  |
| AXL (mm)                                                                                                                                                             | 23,92 <sub>a</sub>  | 1,55  | 23,63 <sub>a</sub>   | 1,69  | 24,90 <sub>a</sub>   | 1,29  | 0,070  |
| Ele F Apex (µm)                                                                                                                                                      | 1,82 <sub>a</sub>   | 1,17  | 1,36 <sub>b</sub>    | 1,08  | 1,91 <sub>a,b</sub>  | 0,70  | 0,039* |
| Ele F Thin (µm)                                                                                                                                                      | 2,06 <sub>a</sub>   | 1,73  | ,79 <sub>b</sub>     | 1,49  | 1,27 <sub>a,b</sub>  | 1,68  | 0,000* |
| Ele B Apex (µm)                                                                                                                                                      | 3,54 <sub>a</sub>   | 3,23  | 2,79 <sub>a</sub>    | 4,55  | 2,27 <sub>a</sub>    | 5,62  | 0,178  |
| Ele B Thin (µm)                                                                                                                                                      | 7,62 <sub>a</sub>   | 5,58  | 8,67 <sub>a</sub>    | 6,54  | 8,27 <sub>a</sub>    | 8,20  | 0,478  |
| Pachy (µm)                                                                                                                                                           | 546,07 <sub>a</sub> | 32,63 | 553,24 <sub>a</sub>  | 39,84 | 551,73 <sub>a</sub>  | 31,73 | 0,342  |
| Sphere (D)                                                                                                                                                           | -,47 <sub>a</sub>   | 3,46  | ,30 <sub>a</sub>     | 3,68  | -1,55 <sub>a</sub>   | 2,32  | 0,227  |
| RA (D)                                                                                                                                                               | ,84 <sub>a</sub>    | 0,86  | 1,05 <sub>a,b</sub>  | 1,30  | 1,63 <sub>b</sub>    | 0,94  | 0,008* |
| ACA (D)                                                                                                                                                              | 1,01 <sub>a</sub>   | 0,79  | ,89 <sub>a</sub>     | 0,63  | 1,43 <sub>a</sub>    | 1,05  | 0,128  |
| PCA (D)                                                                                                                                                              | ,35 <sub>a</sub>    | 0,17  | ,20 <sub>b</sub>     | 0,14  | ,20 <sub>b</sub>     | 0,13  | 0,000* |
| K1F (D)                                                                                                                                                              | 43,34 <sub>a</sub>  | 1,52  | 43,50 <sub>a</sub>   | 1,32  | 42,85 <sub>a</sub>   | 1,13  | 0,445  |
| K2F (D)                                                                                                                                                              | 44,35 <sub>a</sub>  | 1,50  | 44,39 <sub>a</sub>   | 1,29  | 44,28 <sub>a</sub>   | 1,10  | 0,973  |
| KmF (D)                                                                                                                                                              | 43,84 <sub>a</sub>  | 1,46  | 43,94 <sub>a</sub>   | 1,27  | 43,55 <sub>a</sub>   | 0,99  | 0,723  |
| K1B (D)                                                                                                                                                              | -6,19 <sub>a</sub>  | 0,25  | -6,20 <sub>a</sub>   | 0,24  | -6,06 <sub>a</sub>   | 0,36  | 0,241  |
| K2B (D)                                                                                                                                                              | -6,54 <sub>a</sub>  | 0,28  | -6,40 <sub>b</sub>   | 0,25  | -6,27 <sub>b</sub>   | 0,36  | 0,000* |
| KmB (D)                                                                                                                                                              | -6,36 <sub>a</sub>  | 0,25  | -6,30 <sub>a,b</sub> | 0,24  | -6,16 <sub>b</sub>   | 0,35  | 0,012* |
| QF                                                                                                                                                                   | -,31 <sub>a</sub>   | 0,13  | -,26 <sub>b</sub>    | 0,11  | -,31 <sub>a,b</sub>  | 0,10  | 0,045* |
| QB                                                                                                                                                                   | -,28 <sub>a</sub>   | 0,21  | -,21 <sub>a</sub>    | 0,30  | -,24 <sub>a</sub>    | 0,26  | 0,104  |
| Values in the same row and subtable that do not share the same subscript are significantly different at p< 0.05 in the two-sided test for equality for Column Means. |                     |       |                      |       |                      |       |        |
| Cells without a subscript are not included in the test. The tests assume equal variances. <sup>1</sup>                                                               |                     |       |                      |       |                      |       |        |
| <sup>1</sup> Tests are adjusted for all pairwise comparisons within a row of each innermost subtable using the Bonferroni correction.                                |                     |       |                      |       |                      |       |        |

Supplemental Table S3.- Steep axis orientation distribution for ACA and PCA from the literature.

| Authors, year              | Steep ACA axis  |                |                   | Steep PCA axis  |                |                   |
|----------------------------|-----------------|----------------|-------------------|-----------------|----------------|-------------------|
|                            | Vertical<br>WTR | Oblique<br>Obl | Horizontal<br>ATR | Vertical<br>ATR | Oblique<br>Obl | Horizontal<br>WTR |
| <b>Ho, 2009 [7]</b>        | 71,8            | 13,2           | 15                | 96,1            | 1,9            | 2                 |
| <b>Nemeth, 2014 [10]</b>   | 65,8            | 16,4           | 17,8              | 88,7            | 8,2            | 3,1               |
| <b>Mendes, 2021 [13]</b>   | 47              | 16             | 37                | 68              | 19             | 13                |
| <b>Present study</b>       | 73,5            | 14,2           | 12,3              | 93,3            | 5,3            | 1,4               |
| <b>Savini, 2014 [11]</b>   | 84              | 4,5            | 11,5              | 93              | n/a            | n/a               |
| <b>Koch, 2012 [9]</b>      | 50,9            | n/a            | n/a               | 86,8            | n/a            | n/a               |
| <b>Ventura, 2022 [26]</b>  | 74,5            | n/a            | n/a               | 93,1            | n/a            | n/a               |
| <b>Tonn, 2015 [12]</b>     | 71,2            | n/a            | n/a               | 88,8            | n/a            | n/a               |
| <b>Ueno, 2015 [25]</b>     | 63,6            | 10,6           | 25,8              | n/a             | n/a            | n/a               |
| <b>Hoffman, 2010 [23]</b>  | 46,8            | 18,9           | 34,3              | n/a             | n/a            | n/a               |
| <b>Schuster, 2017 [32]</b> | 70,8            | 14,5           | 14,7              | n/a             | n/a            | n/a               |

n/a: not available

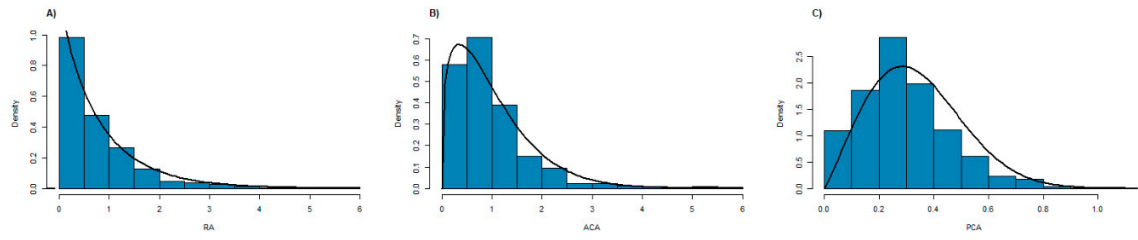

Figure S1. (A–C): Histogram of the RA (A), ACA (B) and PCA (C) with their Weibull density distribution curves. ACA = anterior corneal astigmatism; PCA = posterior corneal astigmatism; RA = Refractive astigmatism.
